# Supplementary material
Source: PubMed Central journal article supplement (PMC2580791)
Supplement: emboj2008216s1.pdf [file emboj2008216s1.pdf]

# **EFC/F-BAR proteins and the N-WASP-WIP complex bind to membranes to induce membrane-curvature dependent actin polymerization**

Kazunari Takano, Kiminori Toyooka, and Shiro Suetsugu

## **Supplementary information**

### **Figure Legends**

**Figure S1.** Illustration of the domain structures of representative proteins used in this study.

**Figure S2.** (A) Binding of wild-type (WT) N-WASP,  $\Delta$ basic N-WASP, N-WASP-WIP complex, and WIP to GST-fusion proteins of the SH3 domain of FBP17 or amphiphysin was examined with a pull-down assay. The N-WASP, WIP, or N-WASP-WIP concentration is indicated. (B) Binding of wild-type (WT) N-WASP, N-WASP-WIP complex, and WIP to GST-fusion proteins of full length of Toca-1 was examined with a pull-down assay.

**Figure S3.** Transmission electron microscopy of negatively stained Folch liposomes: LMVs, SUVs, and liposomes extruded through cyclopore filters with pore sizes of 400 nm, 100 nm, and 50 nm.

**Figure S4.** The myc- and GFP-N-WASP-FLAG-WIP complex proteins and GST-Toca-1 or FBP17 proteins used in this study were visualized with Coomassie brilliant blue staining after SDS-PAGE.

**Figure S5.** Transmission electron microscopy of negatively stained 0.1 mg/ml LMVs in the presence of 600 nM (A) GST-EFC/F-BAR domain protein, (B) wild type (WT) of GST-FBP17, or (C) HHK mutant of GST-FBP17. (D) Distribution of the diameters of the tubules in A-C.

**Fig. S6.** Quantification of binding of (A) WIP, (B) N-WASP, and (C) N-WASP-WIP complex to phosphoinositides. Binding of 400 nM of each protein to 1 mg/ml liposomes (PE/PC/PIP<sub>x</sub> = 8/2/1, PE/PC/PI, PE/PC/PS, or PE/PC/PA = 8/2/3) was examined. Binding of the N-WASP-WIP complex to liposomes was measured by N-WASP binding. Error bars indicate standard deviation (S.D.).

**Figure S7.** Induction of membrane curvature-dependent actin polymerization by N-WASP. (A) Fold activation of actin polymerization by 15 nM N-WASP alone or N-WASP-WIP complex and 20 µg/ml Folch LMVs or SUVs. (B) Actin polymerization induced by 150 nM N-WASP, 600 nM GST-FBP17, and/or 20 µg/ml Folch LMVs. (C) Fold activation of actin polymerization by 600 nM GST-FBP17 in the presence of 300 nM N-WASP alone with 20 µg/ml Folch SUVs or LMVs. (D) Actin polymerization induced by 300 nM  $\Delta$ basic mutant N-WASP, 600 nM GST-FBP17, and/or 20 µg/ml Folch LMVs. (E) Actin polymerization induced by 30 nM N-WASP, 4 µM GST-Cdc42 (GTP $\gamma$ S-loaded), 600 nM GST-Toca-1, and/or 20 µg/ml PIP<sub>2</sub>/PC/PE LMVs (PE/PC/PIP<sub>2</sub> = 8/2/1). (F) Actin polymerization induced by 30 nM N-WASP, 4 µM GST-Cdc42 (GTP $\gamma$ S-loaded), and/or 20 µg/ml Folch LMVs.

**Figure S8.** Cdc42-mediated acceleration of Toca-1-induced activation of the N-WASP-WIP complex. (A, B) Actin polymerization induced by 150 nM N-WASP, 600 nM GST-Toca-1, 2 µM Cdc42 (GTP $\gamma$ S-loaded), and/or 20 µg/ml Folch LMVs (A) or SUVs (B). (C) Actin polymerization induced by 30 nM N-WASP, 4 µM GST-Cdc42 (GTP $\gamma$ S-loaded), 600 nM wild-type (WT) or IST mutant of GST-Toca-1, and/or 20 µg/ml Folch LMVs.

**Figure S9.** Recruitment of N-WASP or N-WASP-WIP complex to the membrane by the

HHK mutant of FBP17. We incubated 300 nM N-WASP-WIP complex, 400 nM wild-type (WT) N-WASP, 400 nM  $\Delta$ basic N-WASP, or 300 nM WIP with 600 nM wild type or HHK mutant of GST-FBP17 and 50  $\mu$ g/ml Folch LMVs. Proteins bound to LMVs were examined by co-sedimentation assay.

**Figure S10.** Recruitment of WIP to the membrane by the HHK mutant of FBP17. We incubated 300 nM WIP with 600 nM wild type or HHK mutant of GST-FBP17 and 50  $\mu$ g/ml Folch LMVs. Proteins bound to LMVs were examined by co-sedimentation assay.

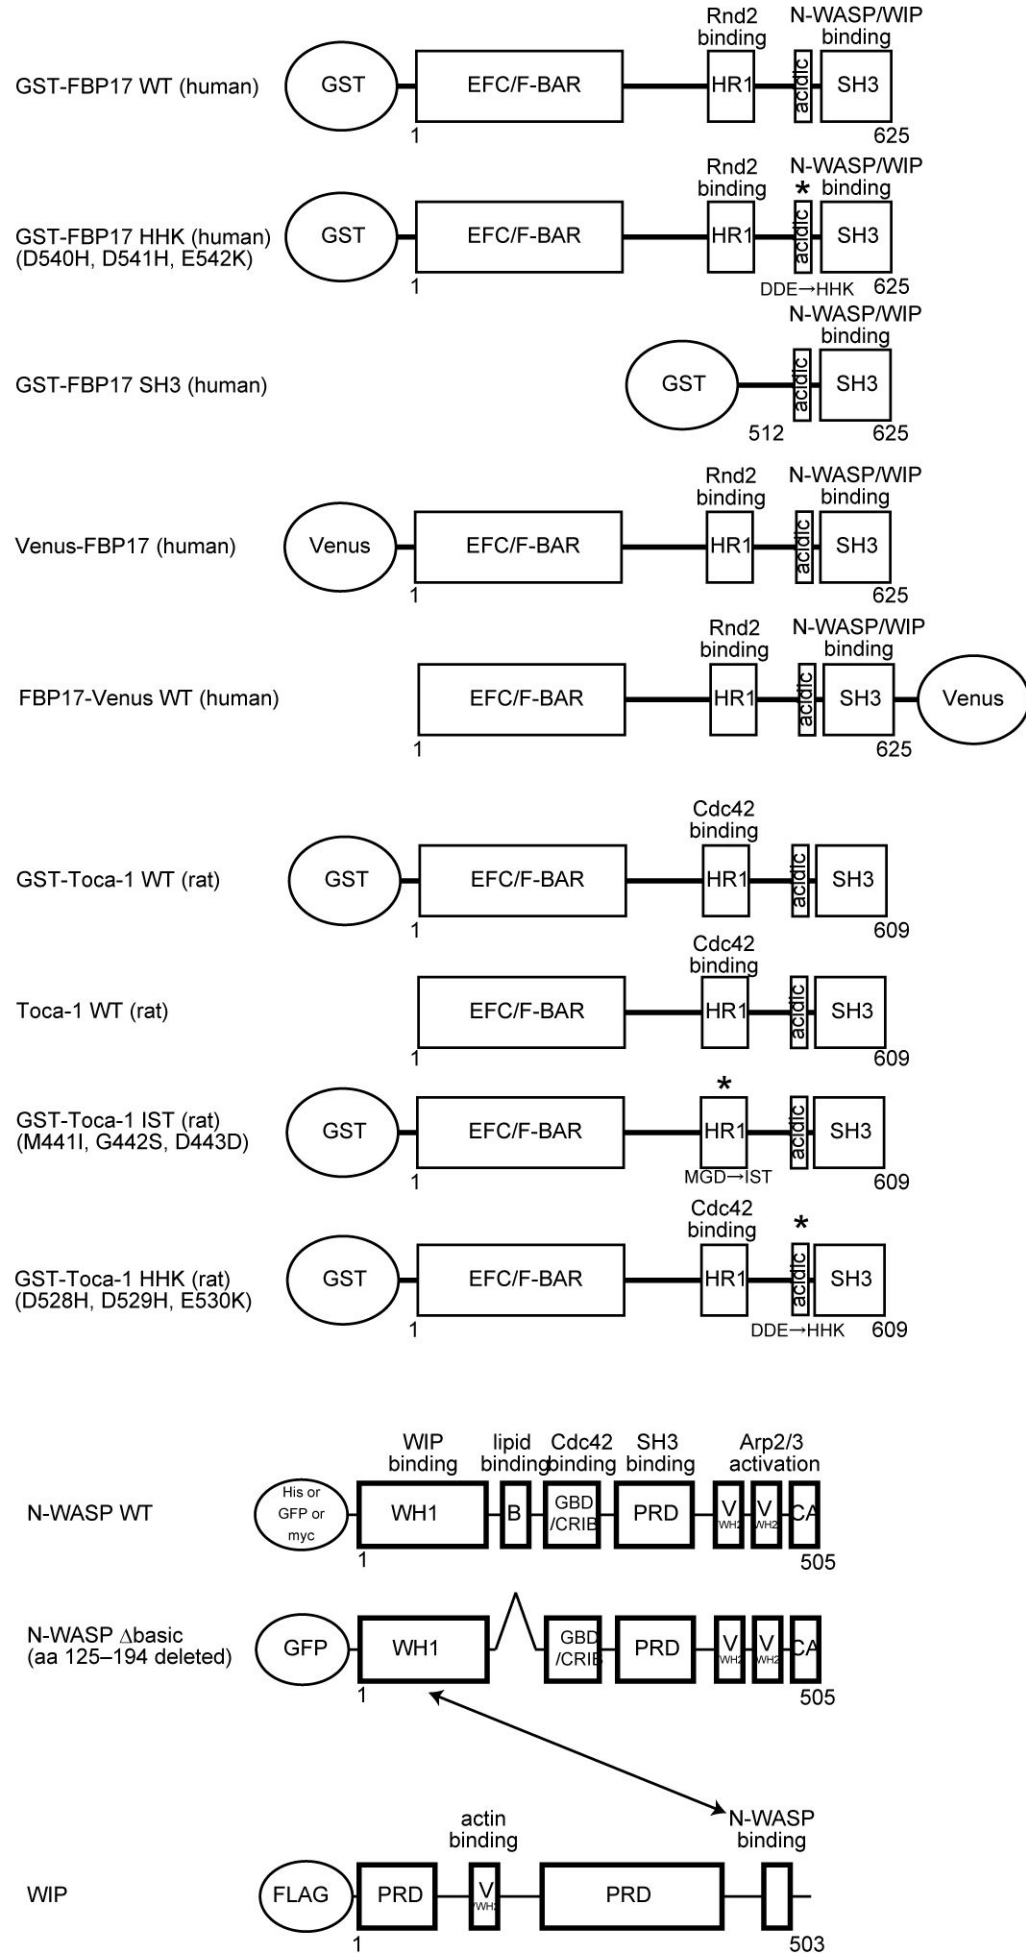

Figure S1, Suetsugu et al.

**A**

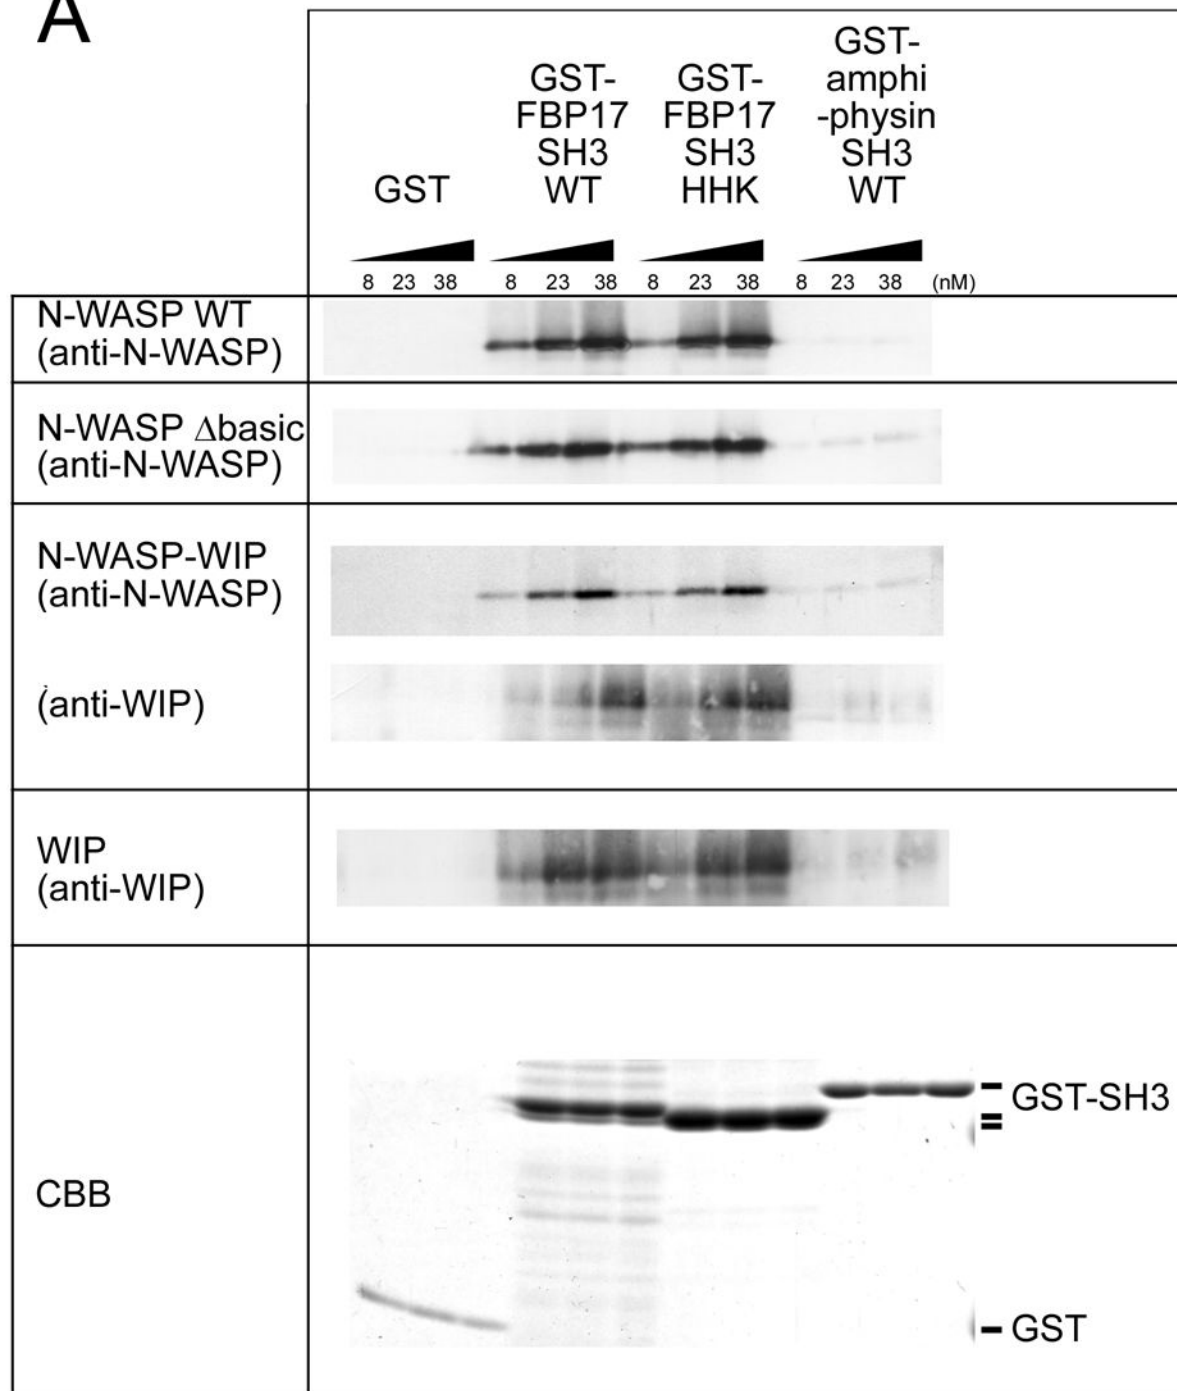

**B**

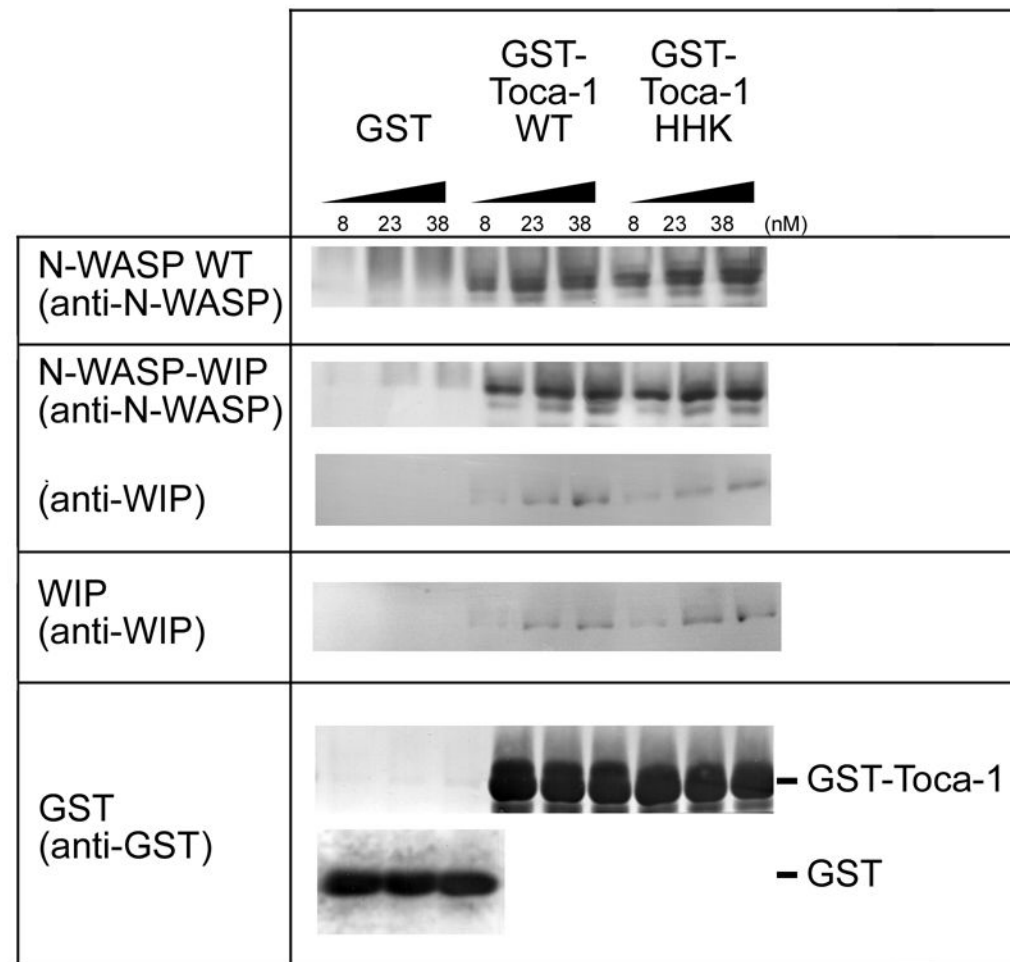

Figure S2, Suetsugu et al

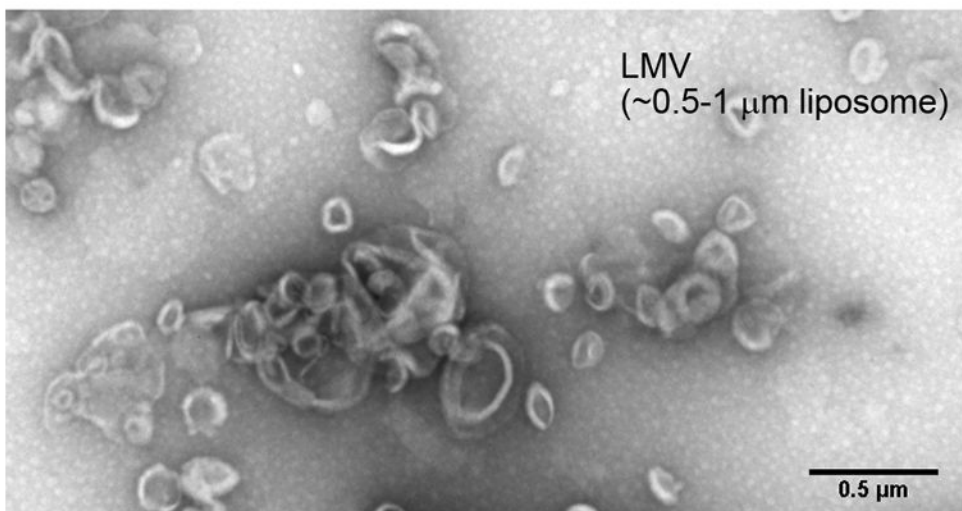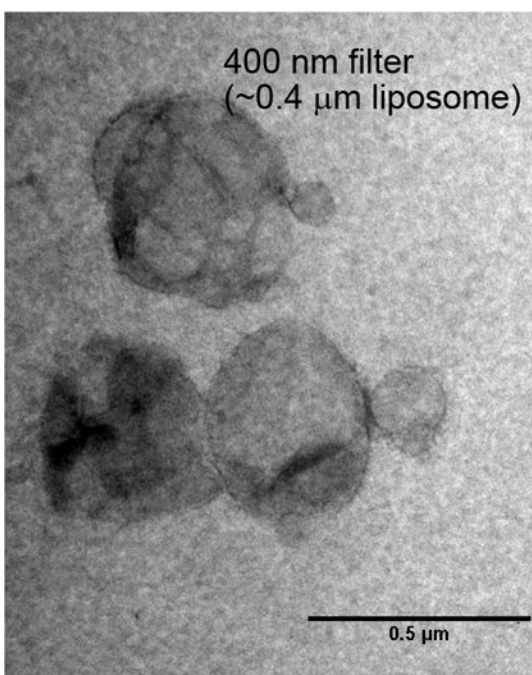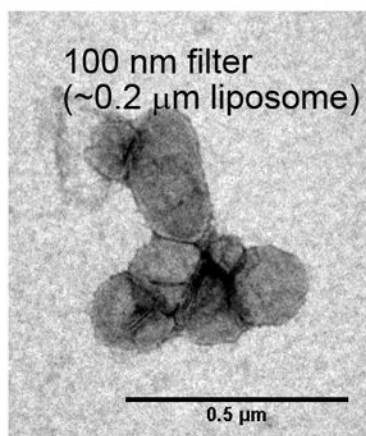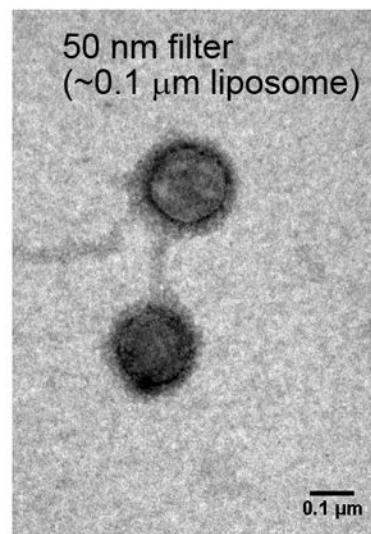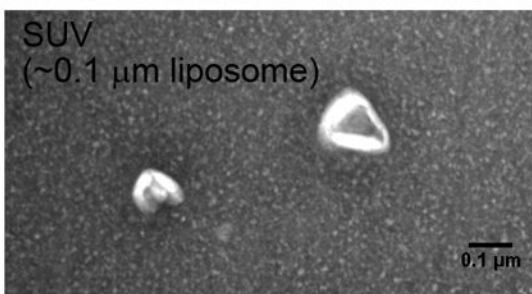

Figure S3, Suetsugu et al

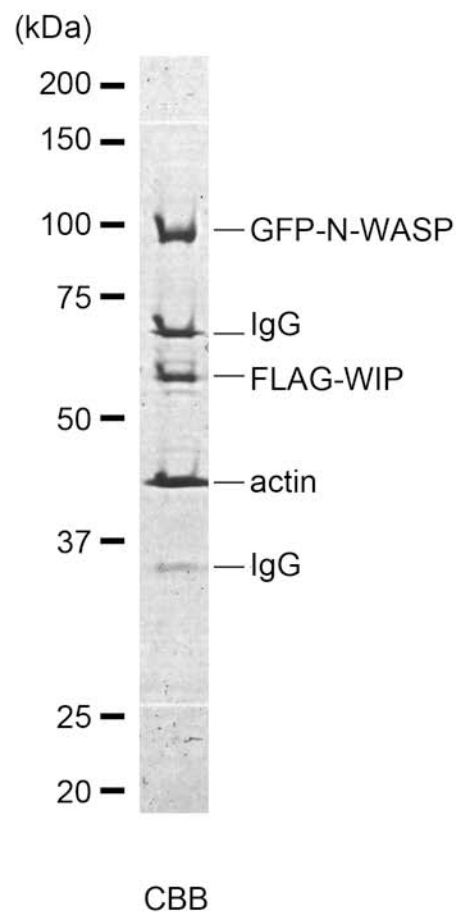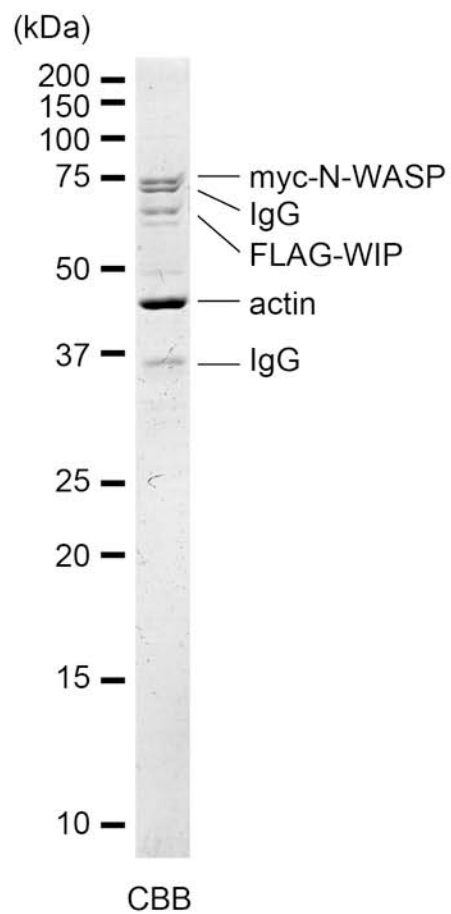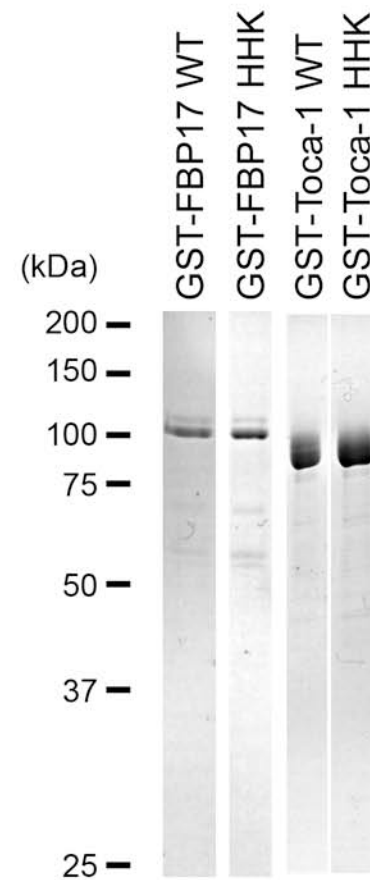

Figure S4, Suetsugu et al

**A**FBP17  
EFC/F-BAR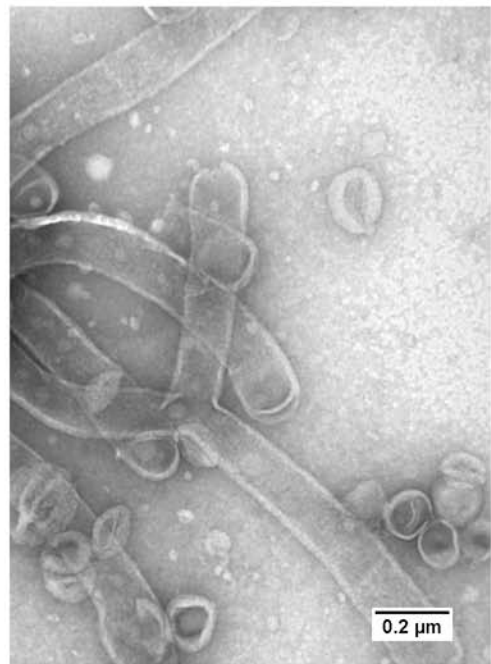**B**

FBP17 WT

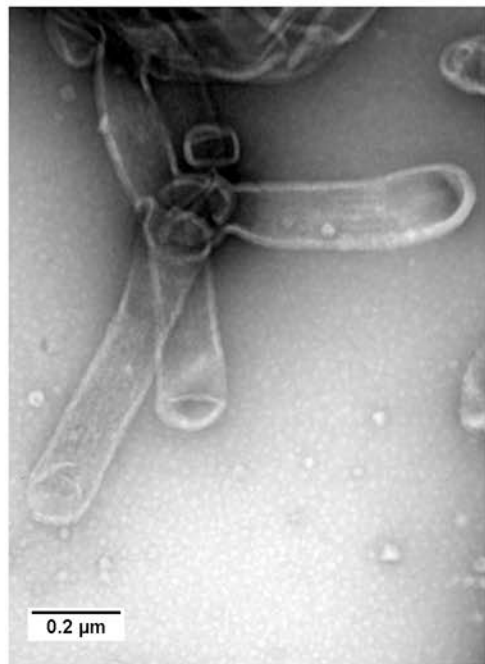**C**

FBP17 HHK

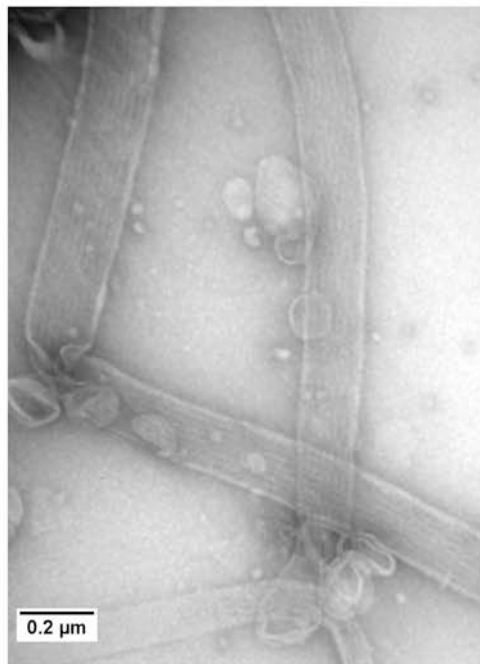**D**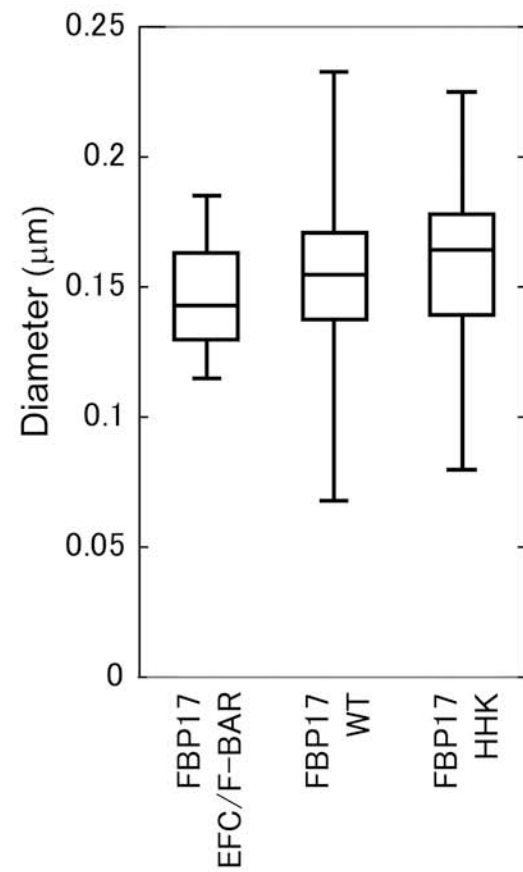

Figure S5, Suetsugu et al



**A**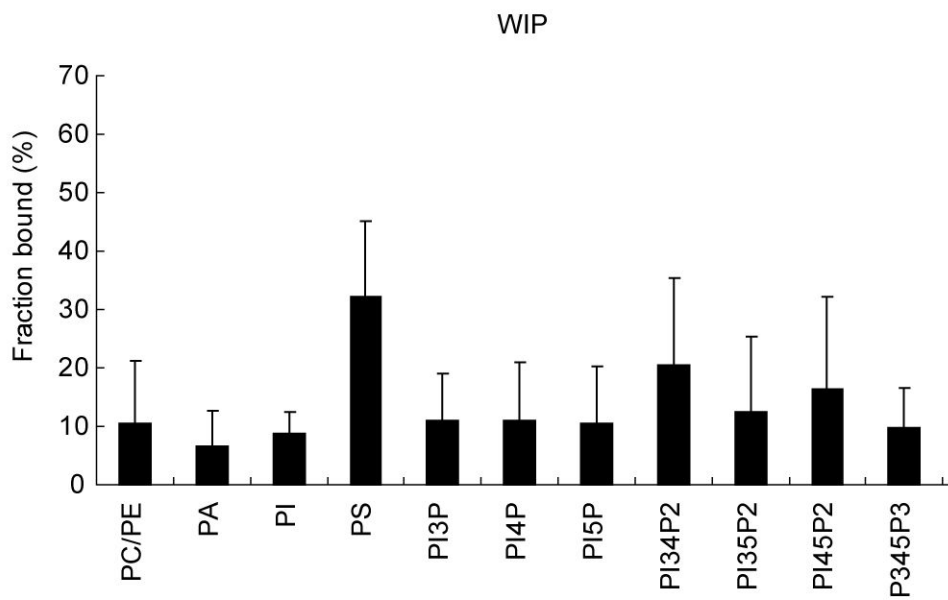**B**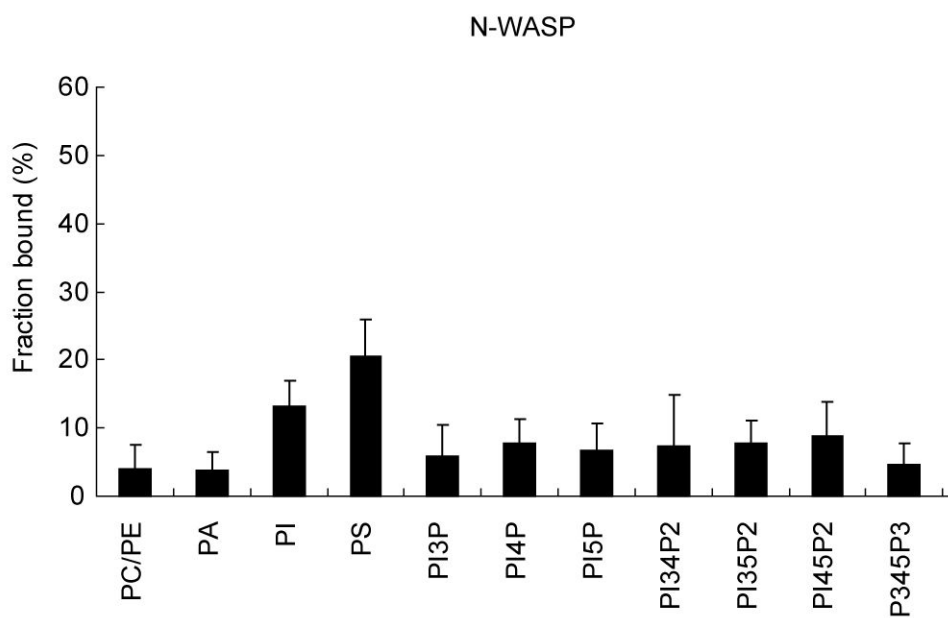**C**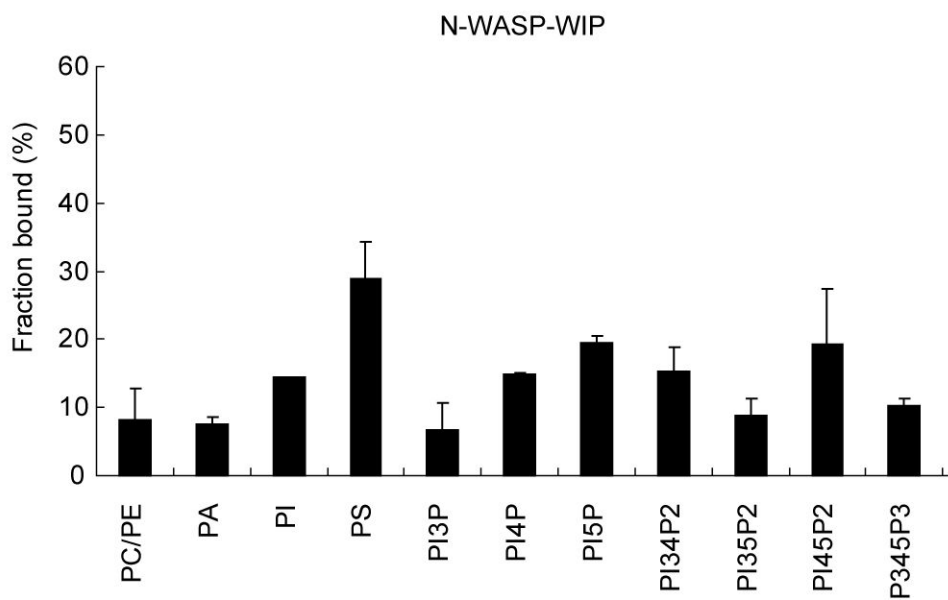

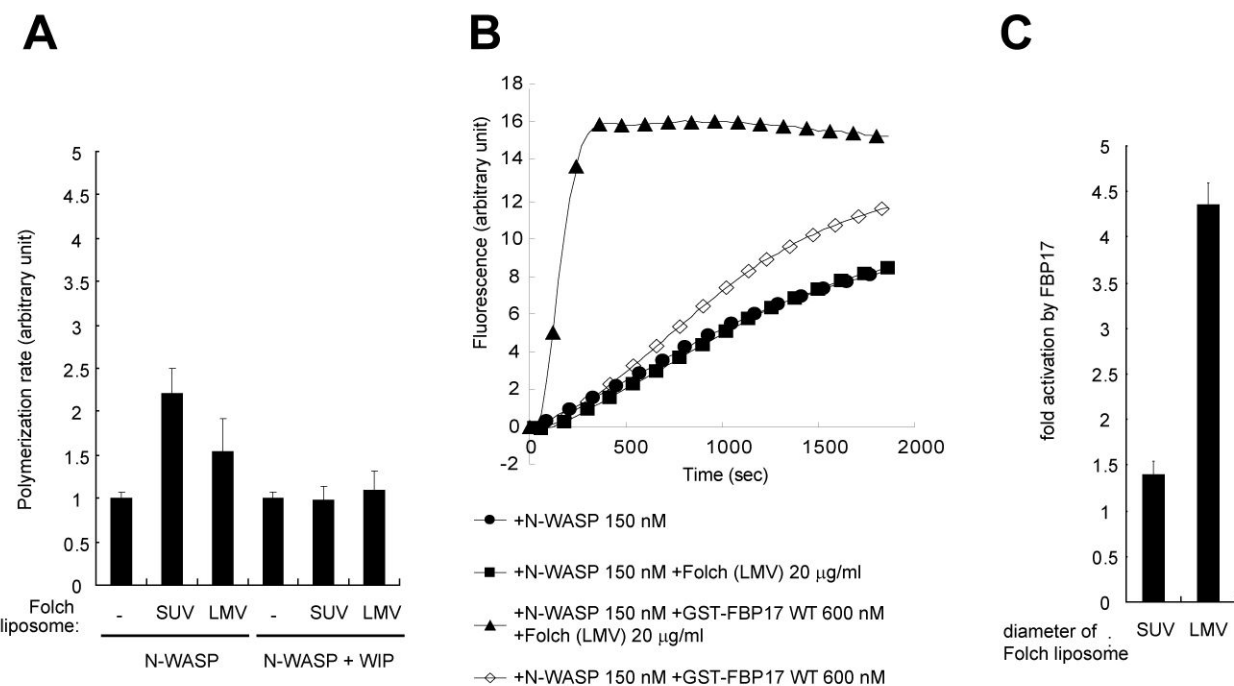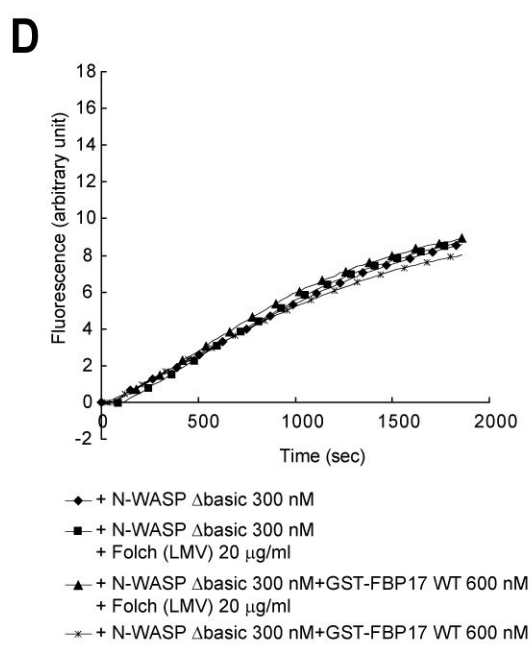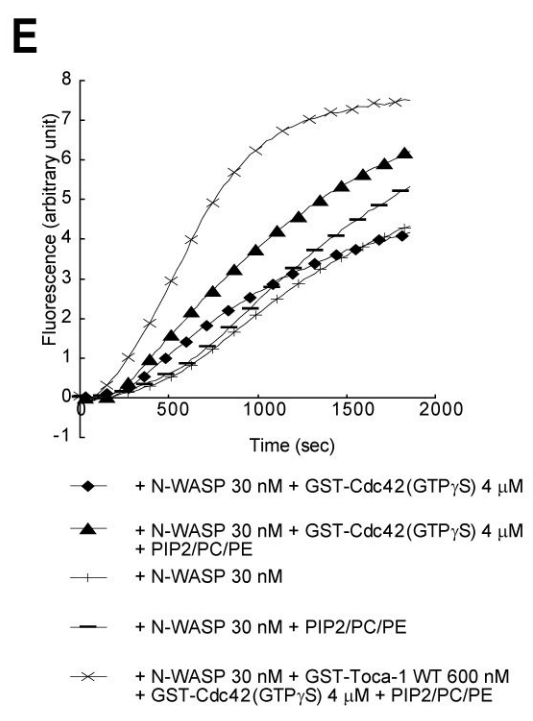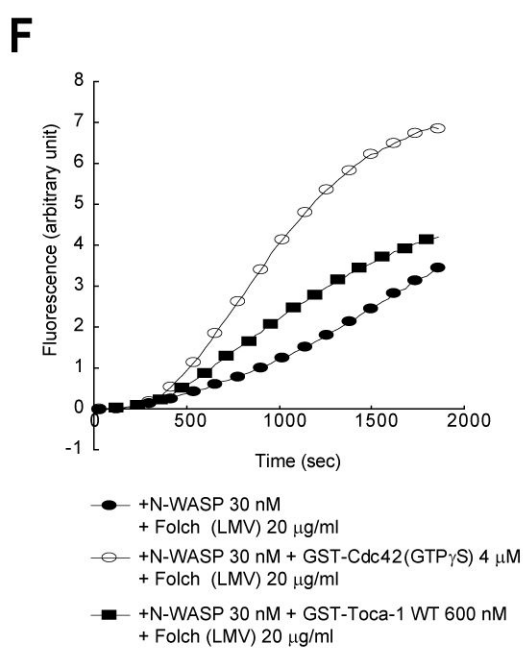

Figure S7, Suetsugu et al

**A**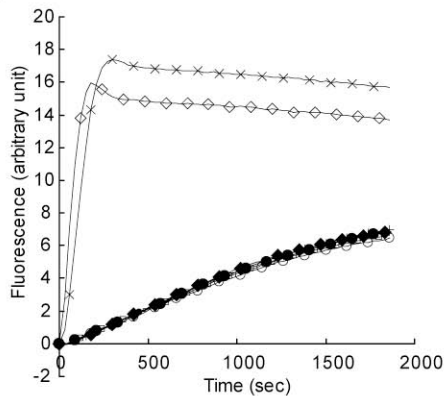

- ◆ N-WASP-WIP 150 nM
- ◻ N-WASP-WIP + Folch (LMV)
- × N-WASP-WIP + Folch (LMV) + GST-Toca-1 600 nM
- N-WASP-WIP + GST-Toca-1 600 nM
- N-WASP-WIP + Cdc42(GTP $\gamma$ S) 2  $\mu$ M
- + N-WASP-WIP + Folch (LMV) + Cdc42(GTP $\gamma$ S) 2  $\mu$ M
- ◇ N-WASP-WIP + Folch (LMV) + GST-Toca-1 600 nM + Cdc42(GTP $\gamma$ S) 2  $\mu$ M

**B**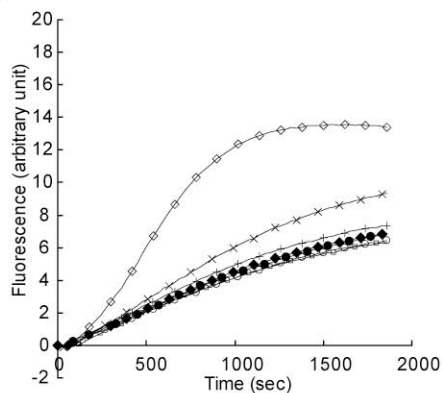

- ◆ N-WASP-WIP 150 nM
- ◻ N-WASP-WIP + Folch (SUV)
- × N-WASP-WIP + Folch (SUV) + GST-Toca-1 600 nM
- N-WASP-WIP + GST-Toca-1 600 nM
- N-WASP-WIP + Cdc42(GTP $\gamma$ S) 2  $\mu$ M
- + N-WASP-WIP + Folch (SUV) + Cdc42(GTP $\gamma$ S) 2  $\mu$ M
- ◇ N-WASP-WIP + Folch (SUV) + GST-Toca-1 600 nM + Cdc42(GTP $\gamma$ S) 2  $\mu$ M

**C**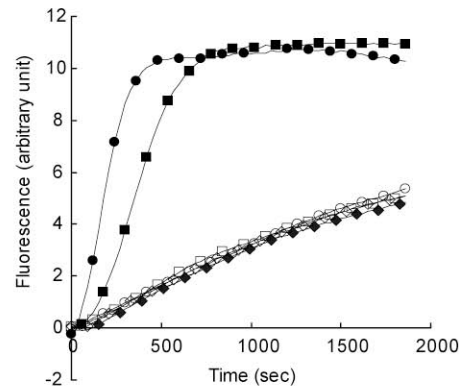

- ◆ N-WASP-WIP 30 nM
- ◇ N-WASP-WIP + GST-Cdc42(GTP $\gamma$ S) 4  $\mu$ M
- ◻ N-WASP-WIP + GST-Toca-1 IST 600 nM
- N-WASP-WIP + GST-Toca-1 WT 600 nM + GST-Cdc42(GTP $\gamma$ S) 4  $\mu$ M
- N-WASP-WIP + GST-Toca-1 WT 600 nM
- N-WASP-WIP + GST-Toca-1 IST 600 nM + GST-Cdc42(GTP $\gamma$ S) 4  $\mu$ M

Figure S8, Suetsugu et al

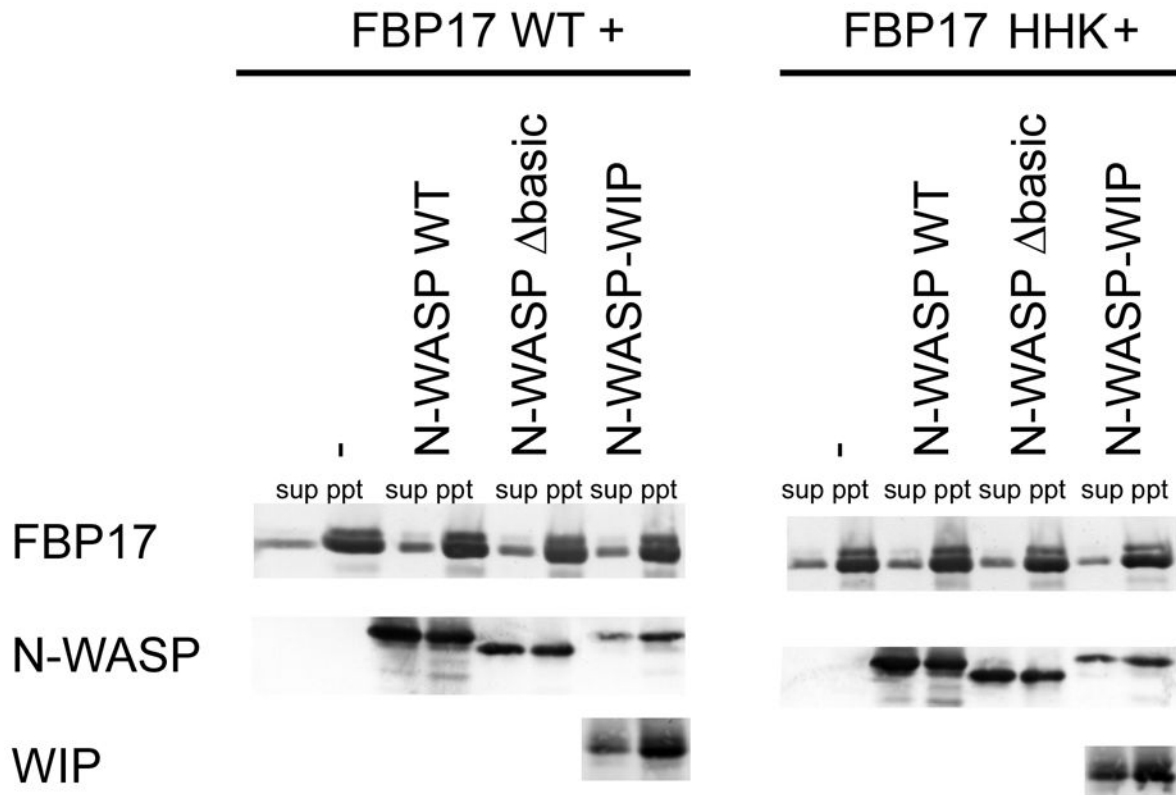

Figure S9, Suetsugu et al

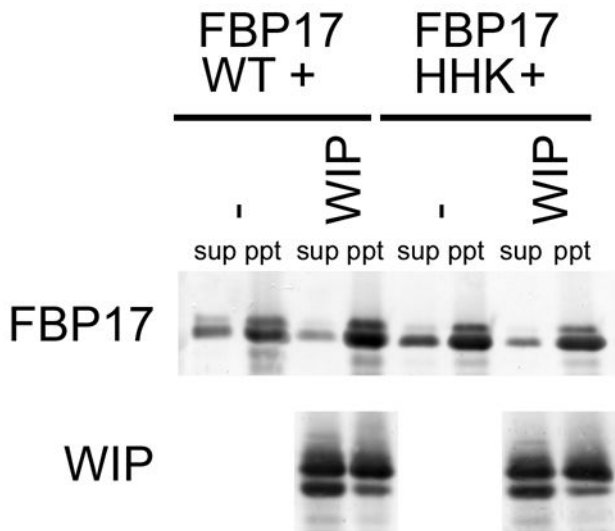

Figure S10, Suetsugu et al
